# Supplementary material for: Estimation of the susceptibility of a road network to shallow landslideswith the integration of the sediment connectivity
Source: Copernicus journal article supplement (doi:10.5194/nhess-2017-457), 2018-01-24
Supplement: Supplementary file [file nhess-2017-457-AC1-supplement.pdf]

**Table 1: Sensitivity of the different predictor variables on the accuracy for the training sets, the test sets and the final application of the model to the entire study area. The standard deviation of accuracy on training and test sets was of 0.01 for all the models, while the range of the 95 % confidence interval of AUC was of 0.02 for all the models.**

| GAM model                                                  | Mean accuracy of training sets (-) | Mean accuracy of test sets (-) | Mean AUC of the model (-) |
|------------------------------------------------------------|------------------------------------|--------------------------------|---------------------------|
| 1                                                          | 0.71                               | 0.70                           | 0.74                      |
| 2                                                          | 0.90                               | 0.90                           | 0.94                      |
| 3                                                          | 0.82                               | 0.82                           | 0.83                      |
| 2 - (CURV, HEI, TWI) [threshold of selection equal to 90%] | 0.84                               | 0.84                           | 0.88                      |
| 2 + (CA) [threshold of selection equal to 50%]             | 0.90                               | 0.90                           | 0.94                      |
| 2 - (SL)                                                   | 0.74                               | 0.74                           | 0.78                      |
| 2 - (CURV)                                                 | 0.87                               | 0.87                           | 0.92                      |
| 2 - (HEI)                                                  | 0.85                               | 0.77                           | 0.91                      |
| 2 - (CS)                                                   | 0.79                               | 0.79                           | 0.83                      |
| 2 - (TWI)                                                  | 0.88                               | 0.88                           | 0.92                      |
| 2 - (DIST)                                                 | 0.75                               | 0.75                           | 0.78                      |
| 2 - (GEO)                                                  | 0.84                               | 0.85                           | 0.88                      |
| 2 + (ASP)                                                  | 0.90                               | 0.90                           | 0.94                      |
| 2 + (LEN)                                                  | 0.90                               | 0.91                           | 0.95                      |
